# Supplementary material for: Transforming a pre‐existing MRI environment into an interventional cardiac MRI suite
Source: PubMed Central journal article supplement — J Cardiovasc Electrophysiol. 2021 Jul 4;32(8):2090–6. doi: 10.1111/jce.15128 (PMC8456838; doi:10.1111/jce.15128), 2021-07-04
Supplement: JCE-32-2090-s001.pdf [file JCE-32-2090-s001.pdf]

## Interventional Cardiac MRI (iCMR) Procedural Workflow

Typical procedure for index arrhythmia: atrial flutter

1. iCMR scanner room setup
  - a. Placement of equipment
    - i. In room monitors
    - ii. Electrophysiology (EP) recording system
    - iii. Ablation generator
    - iv. Irrigation pump and tubing
    - v. Patient monitoring system
    - vi. Anesthesia/infusion pumps
    - vii. Communication system
    - viii. External defibrillator/cardiac stimulator
    - ix. Additional equipment for in-room treatment of adverse events
  - b. Access to required disposable devices for use during the procedure
    - i. Catheter kit
    - ii. Sterile cabling
    - iii. Devices and materials needed for treatment of complications in the iCMR scanner room
2. Patient Preparation
  - a. Sedation/ General anesthesia
  - b. Cardioversion (if required)
  - c. Sterile preparation and draping
  - d. Vascular access
3. Patient Transfer
  - a. Cover/protect sterile access site
  - b. Identification and Removal of all Magnetic Resonance (MR) Unsafe equipment and material
  - c. Physical transfer to iCMR scanner room
4. Patient preparation inside iCMR scanner room
  - a. Introduction into the MRI scanner
  - b. Configure equipment
    - i. Place imaging coils
  - c. Final draping/protection of the sterile field
  - d. Landmark and advance patient
  - e. Transfer of catheters
  - f. Transfer of sterile cables
  - g. Connection of 1<sup>st</sup> catheter
    - i. Catheter cable
  - h. Connection of 2<sup>nd</sup> catheter
    - i. Catheter cable
    - ii. Irrigation tubing (final sterile connection)
5. MR imaging pre-ablation
  - a. 3D cardiac imaging: to create 3D shell for catheter navigation.
  - b. Planning of imaging planes (LAO + RAO + transversal plane): to locate cavo-tricuspid isthmus (CTI)
  - c. *Baseline MR imaging: for tissue characterization at the target ablation location (optional)*

6. Procedure
  - a. Maintain anesthesia throughout procedure
  - b. Introduction of CS catheter
  - c. Placement of CS catheter
  - d. Introduction of ablation catheter
  - e. Create electroanatomical map (EAM) with catheter
  - f. Create 'design ablation line'
  - g. *MR imaging: confirm catheter location at target location between EAM and MRI (optional)*
  - h. CTI ablation**
    - i. Create EAM post ablation to detect activation times
    - j. Electrical confirmation of conduction block
    - k. MR imaging post ablation
      - i. Exclude complications (e.g. pericardial effusion)
      - ii. *Tissue characterization at the ablation location (optional)*
    - l. Removal of catheters
7. Removal From iCMR scanner room
  - a. Retract patient table
  - b. Cover sterile access site
  - c. Disconnect cabling and remove components
    - i. Advantage-MR
    - ii. In vivo patient monitor
  - d. Remove MR imaging coil
  - e. Disconnect patient table
  - f. Transfer patient outside MRI room
  - g. Detubate patient and remove vascular access sheaths
  - h. Transfer patient to recovery
  - i. Reconfigure laboratory for diagnostic use

**Potential Complications** (follow site specific protocols)

1. Treatment in the MR scanner (zone 4)
  - a. Retract patient table while maintaining patient position and MR landmark
  - b. Follow treatment protocol
  - c. Return patient to landmark and proceed with procedure
2. Treatment in the radiology department outside the MRI scanner (zone 3)
  - a. Follow evacuation protocol to remove patient from MRI
  - b. Transfer patient beyond 5Gauss line
  - c. Follow treatment protocol
  - d. Return patient to the MR or transfer to EP fluoroscopy lab / operating room (OR) when indicated
3. Treatment outside of the radiology department (i.e. EP lab or OR)
  - a. Follow evacuation protocol (with emergency pacing protocol, if required)
  - b. Transfer patient to catheterization lab or operating room
